# Supplementary material for: Preparation and characterization of new sulfate reference materials for Δ17O analysis
Source: Royal Society of Chemistry journal article supplement (doi:10.1039/d2ja00022a), 2022-01-01
Supplement: d2ja00022a1.pdf [file d2ja00022a1.pdf]

1  
2  
3  
4  
5  
6  
7  
8  
9  
10  
11  
12  
13  
14  
15  
16  
17  
18  
19  
20  
21  
22  
23  
24  
25

## Supplementary information

### Preparation and characterization of new sulfate reference materials for $\Delta^{17}\text{O}$ analysis

Guangming Su<sup>a</sup>, Qichao Yang<sup>b</sup>, Yourong Tian<sup>c</sup>, Tianming Ma<sup>a</sup>, Lei Geng<sup>a,d\*</sup>

<sup>a</sup> School of Earth and Space Sciences, University of Science and Technology of China, Hefei, Anhui, 230026, China

<sup>b</sup> School of Chemical Engineering and Technology, Guangdong Industry Polytechnic, Guangzhou 510300, China

<sup>c</sup> ThermoFisher Scientific (China) Co., Ltd, Beijing, 100043, China

<sup>d</sup> CAS Center for Excellence in Comparative Planetology, University of Science and Technology of China, Hefei, Anhui, 230026, China

\* Correspondence to: [genglei@ustc.edu.cn](mailto:genglei@ustc.edu.cn)

## 26 **Supplementary Information Text**

### 27 **Text 1 The details of $\Delta^{17}\text{O}$ ( $\text{SO}_4^{2-}$ ) measurement using pyrolysis system**

28 For sample analysis, sliver sulfate samples in home-made quartz or platinum capsules are loaded  
29 in the zero-blank autosampler sitting on top of TC/EA. The sample is then delivered to the  
30 pyrolysis tube inside TC/EA, where  $\text{Ag}_2\text{SO}_4$  is heated at 1000 °C to produce  $\text{O}_2$  and byproducts  
31 (e.g.,  $\text{SO}_2$ ). The gas products are carried by He to a  $\text{LN}_2$  trap where condensable gases are  
32 scrubbed while  $\text{O}_2$  passes through. For samples with micromole levels of  $\text{SO}_4^{2-}$ ,  $\text{O}_2$  from the  $\text{LN}_2$   
33 trap is introduced directly to the high-flow peripheral of ConFlo IV after further purified by a 60  
34 cm gas chromatography (GC) column (1/4") packed with 5 Å molecular sieve held at 30 °C, and  
35 then to the IRMS for  $m/z$  32, 33, and 34 measurements. This is the TC/EA-IRMS mode as  
36 indicated in Figure 2.

37 For samples with sub-micromole levels of  $\text{SO}_4^{2-}$ , the produced  $\text{O}_2$  has to be first concentrated  
38 by the home-made pre-concentration system prior to entering IRMS, otherwise the sample peak  
39 would be too small to be precisely quantified.<sup>1</sup> This is the TC/EA-Precon-IRMS mode as shown  
40 in Figure 2, where  $\text{O}_2$  after the  $\text{LN}_2$  trap is first trapped in a 60 cm stainless steel 1/16" tubing  
41 packed with silica gel (Trap A) at  $\text{LN}_2$  temperature through an eight-way valco valve at the load  
42 position. After 5 minutes of trapping, the valco valve is switched to inject position. Then 'Trap A'  
43 is thawed and  $\text{O}_2$  is transferred to a second cold trap (Trap B) which is a 60 cm capillary tubing  
44 packed with silica gel. After  $\text{O}_2$  is transferred to 'Trap B', it is then thawed and  $\text{O}_2$  is carried to a  
45 capillary GC (5 Å molecular sieve, 30 m × 0.32 mm i.d., Agilent Technologies Inc., USA) at 30  
46 °C where  $\text{O}_2$  is further purified before entering IRMS through the low-flow peripheral of ConFlo  
47 IV.

48

49

50

51

52

53

54

55 **Table S1.** The raw  $\Delta^{17}\text{O}$  values of sulfate measured in quartz capsules from all experiments. The  
 56  $\text{Na}_2\text{SO}_3$  mass indicates the starting amount of sulfide in solution; amount of  $\text{O}_3$  trapped was  
 57 indicated by total trapping time (total trapping time = trapping times  $\times$  20 minutes each time);  
 58 Total reaction time indicates the total duration of  $\text{O}_3$  thawing in an experiment; Yield is referred  
 59 to the fraction of sulfate in solution after an experiment.

| Number                           | Mass of $\text{Na}_2\text{SO}_3$ (g) | Total trapping time (minute) | Total reaction time (minute) | Yield (%) | Raw $\Delta^{17}\text{O}$ (‰) |
|----------------------------------|--------------------------------------|------------------------------|------------------------------|-----------|-------------------------------|
| <b>Sulf-A</b>                    |                                      |                              |                              |           |                               |
| S1-H <sub>2</sub> O <sub>2</sub> | 1.8                                  | NA                           | NA                           | 100       | 0.0                           |
| S21-O <sub>3</sub>               | 0.63                                 | 100 (5 $\times$ 20)          | 220                          | 70        | 1.2                           |
| S39-O <sub>3</sub>               | 1.26                                 | 160 (8 $\times$ 20)          | 440                          | 100       | 1.1                           |
| <b>Sulf-B</b>                    |                                      |                              |                              |           |                               |
| S2-H <sub>2</sub> O <sub>2</sub> | 0.7                                  | NA                           | NA                           | 100       | 0.0                           |
| S13-O <sub>3</sub>               | 0.0252                               | 20 (1 $\times$ 20)           | 40                           | 100       | 3.0                           |
| S14-O <sub>3</sub>               | 0.063                                | 40 (2 $\times$ 20)           | 90                           | 100       | 2.8                           |
| S15-O <sub>3</sub>               | 0.063                                | 40 (2 $\times$ 20)           | 60                           | 50        | 2.0                           |
| S17-O <sub>3</sub>               | 0.189                                | 60 (3 $\times$ 20)           | 110                          | 100       | 1.8                           |
| S22-O <sub>3</sub>               | 0.063                                | 60 (3 $\times$ 20)           | 80                           | 100       | 1.8                           |
| S24-O <sub>3</sub>               | 1.26                                 | 200 (10 $\times$ 20)         | 420                          | 100       | 1.5                           |
| S25-O <sub>3</sub>               | 0.63                                 | 160 (8 $\times$ 20)          | 390                          | 100       | 1.8                           |
| S30-O <sub>3</sub>               | 0.063                                | 60 (3 $\times$ 20)           | 100                          | 100       | 3.0                           |
| S31-O <sub>3</sub>               | 0.063                                | 60 (3 $\times$ 20)           | 90                           | 100       | 2.5                           |
| S33-O <sub>3</sub>               | 0.063                                | 60 (3 $\times$ 20)           | 110                          | 100       | 3.6                           |
| S34-O <sub>3</sub>               | 0.063                                | 60 (3 $\times$ 20)           | 100                          | 100       | 2.5                           |
| S35-O <sub>3</sub>               | 0.063                                | 60 (3 $\times$ 20)           | 110                          | 100       | 3.0                           |
| S36-O <sub>3</sub>               | 0.063                                | 60 (3 $\times$ 20)           | 140                          | 100       | 3.3                           |
| S37-O <sub>3</sub>               | 0.063                                | 60 (3 $\times$ 20)           | 120                          | 100       | 2.8                           |
| S38-O <sub>3</sub>               | 0.063                                | 60 (3 $\times$ 20)           | 120                          | 100       | 2.6                           |
| S40-O <sub>3</sub>               | 0.063                                | 60 (3 $\times$ 20)           | 110                          | 100       | 2.3                           |
| S41-O <sub>3</sub>               | 0.063                                | 60 (3 $\times$ 20)           | 120                          | 100       | 2.6                           |
| S42-O <sub>3</sub>               | 0.063                                | 60 (3 $\times$ 20)           | 120                          | 100       | 3.0                           |
| <b>Sulf-C</b>                    |                                      |                              |                              |           |                               |
| S16-O <sub>3</sub>               | 0.063                                | 60 (3 $\times$ 20)           | 150                          | 100       | 4.1                           |
| S19-O <sub>3</sub>               | 0.063                                | 60 (3 $\times$ 20)           | 200                          | 100       | 5.7                           |
| S26-O <sub>3</sub>               | 0.063                                | 60 (3 $\times$ 20)           | 180                          | 100       | 5.0                           |
| S28-O <sub>3</sub>               | 0.063                                | 60 (3 $\times$ 20)           | 160                          | 100       | 4.6                           |
| S29-O <sub>3</sub>               | 0.063                                | 60 (3 $\times$ 20)           | 160                          | 100       | 5.0                           |
| S32-O <sub>3</sub>               | 0.063                                | 60 (3 $\times$ 20)           | 150                          | 100       | 4.2                           |
| S43-O <sub>3</sub>               | 0.063                                | 60 (3 $\times$ 20)           | 130                          | 100       | 4.7                           |
| S44-O <sub>3</sub>               | 0.063                                | 60 (3 $\times$ 20)           | 180                          | 100       | 4.7                           |
| S45-O <sub>3</sub>               | 0.063                                | 60 (3 $\times$ 20)           | 180                          | 100       | 4.5                           |
| S46-O <sub>3</sub>               | 0.063                                | 60 (3 $\times$ 20)           | 200                          | 100       | 5.0                           |
| S47-O <sub>3</sub>               | 0.063                                | 60 (3 $\times$ 20)           | 260                          | 100       | 6.7                           |
| S48-O <sub>3</sub>               | 0.063                                | 60 (3 $\times$ 20)           | 265                          | 100       | 7.3                           |
| S49-O <sub>3</sub>               | 0.063                                | 60 (3 $\times$ 20)           | 265                          | 100       | 7.3                           |
| S50-O <sub>3</sub>               | 0.063                                | 60 (3 $\times$ 20)           | 260                          | 100       | 6.5                           |

|                        |                                                |                                     |                                     |              |                                          |
|------------------------|------------------------------------------------|-------------------------------------|-------------------------------------|--------------|------------------------------------------|
| S51-O <sub>3</sub>     | 0.063                                          | 60 (3 × 20)                         | 255                                 | 100          | 6.7                                      |
| S52-O <sub>3</sub>     | 0.063                                          | 60 (3 × 20)                         | 265                                 | 100          | 7.2                                      |
| S53-O <sub>3</sub>     | 0.063                                          | 60 (3 × 20)                         | 270                                 | 100          | 6.7                                      |
| S54-O <sub>3</sub>     | 0.063                                          | 60 (3 × 20)                         | 235                                 | 100          | 6.2                                      |
| S55-O <sub>3</sub>     | 0.063                                          | 60 (3 × 20)                         | 255                                 | 100          | 5.9                                      |
| S56-O <sub>3</sub>     | 0.063                                          | 60 (3 × 20)                         | 250                                 | 100          | 5.7                                      |
| S57-O <sub>3</sub>     | 0.063                                          | 60 (3 × 20)                         | 200                                 | 100          | 5.4                                      |
| S58-O <sub>3</sub>     | 0.063                                          | 60 (3 × 20)                         | 200                                 | 100          | 5.3                                      |
| S59-O <sub>3</sub>     | 0.126                                          | 100 (5 × 20)                        | 360                                 | 100          | 5.2                                      |
| S60-O <sub>3</sub>     | 0.063                                          | 60 (3 × 20)                         | 180                                 | 100          | 4.0                                      |
| S61-O <sub>3</sub>     | 0.063                                          | 60 (3 × 20)                         | 190                                 | 100          | 4.3                                      |
| S62-O <sub>3</sub>     | 0.063                                          | 60 (3 × 20)                         | 205                                 | 100          | 4.8                                      |
| <b>Silica gel</b>      |                                                |                                     |                                     |              |                                          |
| S18-O <sub>3</sub>     | 0.063                                          | 60 (3 × 20)                         | 110                                 | 20           | 0.4                                      |
| S10-O <sub>3</sub>     | 0.063                                          | 100 (5 × 20)                        | 240                                 | 30           | 0.6                                      |
| S11-O <sub>3</sub>     | 0.0063                                         | 20 (1 × 20)                         | 40                                  | 20           | 1.0                                      |
| <b>N-O<sub>3</sub></b> |                                                |                                     |                                     |              |                                          |
| <b>Number</b>          | <b>Mass of NaNO<sub>2</sub>(g)<sup>a</sup></b> | <b>Total trapping time (minute)</b> | <b>Total reaction time (minute)</b> | <b>Yield</b> | <b>Raw Δ<sup>17</sup>O (‰) (n=4, 1σ)</b> |
| N1-O <sub>3</sub>      | 0.0069                                         | 40 (2 × 20)                         | 80                                  | 100          | 14.3 ± 0.1                               |
| N2-O <sub>3</sub>      | 0.0138                                         | 80 (4 × 20)                         | 150                                 | 100          | 14.2 ± 0.1                               |

60 a. Measured in silver capsules.

61

62

63

64

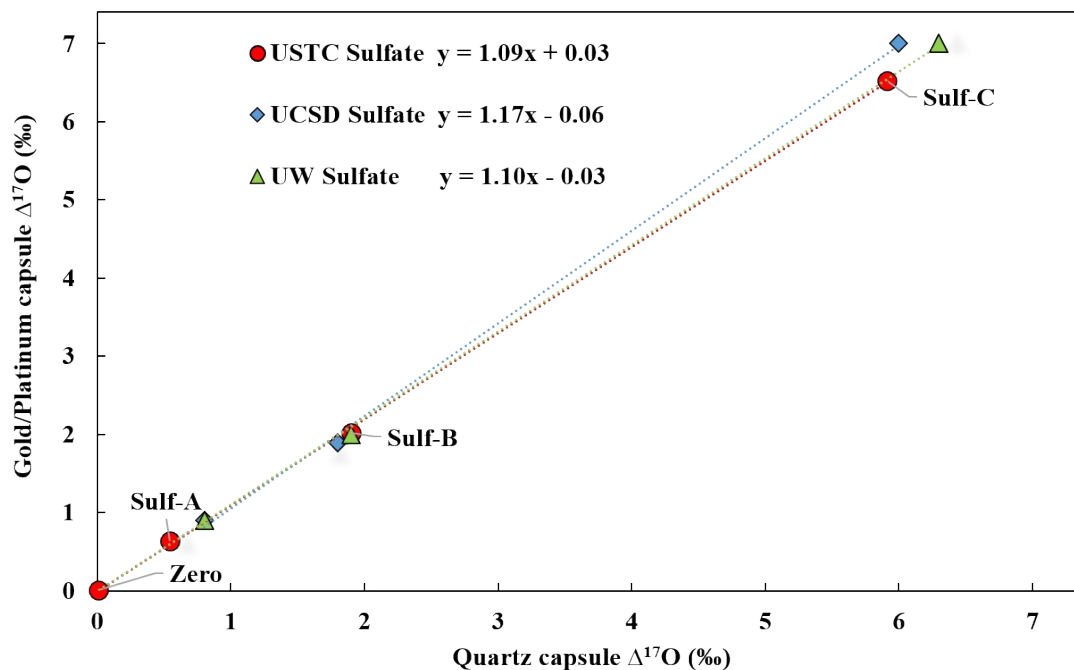

65

66 **Figure S1.** Mean  $\Delta^{17}\text{O}$  values of Sulf-A, Sulf-B and Sulf-C measured in platinum capsules versus  
 67 in quartz capsules. Results of similar phenomena (i.e., oxygen isotope exchange with quartz)  
 68 from UW<sup>2</sup> and UCSD<sup>3</sup> were also plotted for comparison.

69

70

## 71 **References**

- 72 1 L. Geng, A. J. Schauer, S. A. Kunasek, E. D. Sofen, J. Erbland, J. Savarino, D. J. Allman, R. S.  
 73 Sletten and B. Alexander, *Rapid Commun Mass Sp*, 2013, **27**, 2411-2419.  
 74 2 A. J. Schauer, S. A. Kunasek, E. D. Sofen, J. Erbland, J. Savarino, B. W. Johnson, H. M. Amos, R.  
 75 Shaheen, M. Abaunza, T. L. Jackson, M. H. Thiemens and B. Alexander, *Rapid Commun*  
 76 *Mass Sp*, 2012, **26**, 2151-2157.  
 77 3 G. Michalski, J. Savarino, J. K. Bohlke and M. Thiemens, *Anal Chem*, 2002, **74**, 4989-4993.

78
